# Supplementary material for: Prevalence and Evolution Analysis of Porcine Circovirus 3 in China from 2018 to 2022
Source: MDPI journal article supplement (doi:10.3390/ani12121588), 2022-06-20
Supplement: s1 [file s1]

**Table S1. Prevalence of PCV3 in serum samples from different years of China by PCR**

| Collection date | Specimen numbers | Positive samples | Positive rate (%) |
|-----------------|------------------|------------------|-------------------|
| 2018            | 71               | 0                | 0.00              |
| 2019            | 247              | 3                | 1.21              |
| 2020            | 345              | 25               | 7.25              |
| 2021            | 1880             | 731              | 38.88             |
| 2022            | 164              | 82               | 50.0              |
| Total           | 2707             | 841              | 31.07             |
