# Supplementary material for: Prevalence and Evolution Analysis of Porcine Circovirus 3 in China from 2018 to 2022
Source: MDPI journal article supplement (doi:10.3390/ani12121588), 2022-06-20
Supplement: s1 [file s1]

Table S2. Similarities of nucleotides (nt) and amino acids (aa) of the ORF2 genome (Cap) of PCV-3 sequences (%)

| Representative PCV-3 Strains |                       |                       |                 | PCV-3 Strains Obtained in This Study |       |                   |       |                   |       |                   |       |                 |       |                 |       |               |       |
|------------------------------|-----------------------|-----------------------|-----------------|--------------------------------------|-------|-------------------|-------|-------------------|-------|-------------------|-------|-----------------|-------|-----------------|-------|---------------|-------|
| Sub-clade                    | GenBank accession no. | Strain name           | Collection date | CN/Tianjin-1/2021                    |       | CN/Tianjin-2/2021 |       | CN/Tianjin-3/2021 |       | CN/Guangdong/2021 |       | CN/Hebei-1/2021 |       | CN/Hebei-2/2021 |       | CN/Henan/2022 |       |
|                              |                       |                       |                 | nt                                   | aa    | nt                | aa    | nt                | aa    | nt                | aa    | nt              | aa    | nt              | aa    | nt            | aa    |
| 3a                           | MF805724.1            | 4332-7/Denmark/2017   | 2017            | 99.8                                 | 98.27 | 99.8              | 98.27 | 99.61             | 97.69 | 99.61             | 97.69 | 98.24           | 95.95 | 98.63           | 96.53 | 98.63         | 96.53 |
|                              | MF155642.1            | Chian/GX2016-2        | 2016            | 99.41                                | 97.11 | 99.41             | 97.11 | 99.22             | 96.53 | 99.22             | 96.53 | 97.85           | 94.8  | 98.24           | 95.38 | 98.24         | 95.38 |
|                              | MF079253.1            | BR/RS/6               | 2016            | 99.02                                | 96.53 | 99.02             | 96.53 | 98.83             | 95.95 | 98.83             | 95.95 | 98.04           | 94.8  | 98.24           | 94.8  | 98.24         | 94.8  |
|                              | MF063071.1            | 16R927/2016           | 2016            | 98.63                                | 95.38 | 98.63             | 95.38 | 98.43             | 94.8  | 98.43             | 94.8  | 97.65           | 93.64 | 97.85           | 93.64 | 97.85         | 93.64 |
|                              | KT869077.1            | 29160                 | 2015            | 98.43                                | 94.8  | 98.43             | 94.8  | 98.24             | 94.22 | 98.24             | 94.22 | 97.46           | 93.06 | 97.65           | 93.06 | 97.65         | 93.06 |
|                              | MF589132.1            | CN/Jiangxi-QN3/2016   | 2016            | 99.02                                | 97.11 | 99.02             | 97.11 | 98.83             | 96.53 | 98.83             | 96.53 | 97.46           | 94.8  | 97.85           | 95.38 | 97.85         | 95.38 |
|                              | MF589127.1            | CN/Hunan-HWF2/2017    | 2017            | 99.22                                | 96.53 | 99.22             | 96.53 | 99.02             | 95.95 | 99.02             | 95.95 | 97.65           | 94.22 | 98.04           | 94.8  | 98.04         | 94.8  |
|                              | MG014363.1            | DE4.3                 | 2015            | 99.41                                | 97.69 | 99.41             | 97.69 | 99.22             | 97.11 | 99.22             | 97.11 | 97.85           | 95.38 | 98.24           | 95.95 | 98.24         | 95.95 |
|                              | MG014376.1            | DE55.1                | 2015            | 99.22                                | 97.11 | 99.22             | 97.11 | 99.02             | 96.53 | 99.02             | 96.53 | 98.04           | 94.8  | 98.43           | 95.38 | 98.43         | 95.38 |
| 3b                           | MZ449244.1            | Sichuan/2020          | 2020            | 99.61                                | 98.27 | 99.61             | 98.27 | 99.41             | 97.69 | 99.41             | 97.69 | 98.43           | 95.95 | 98.83           | 96.53 | 98.83         | 96.53 |
|                              | MF589123.1            | CN/Guangxi-WZ/2016    | 2016            | 98.24                                | 94.8  | 98.24             | 94.8  | 98.43             | 95.38 | 98.04             | 94.22 | 98.24           | 94.8  | 98.63           | 95.38 | 98.24         | 95.38 |
|                              | KY996337.1            | KU-1601               | 2016            | 98.83                                | 95.38 | 98.83             | 95.38 | 99.02             | 95.95 | 98.63             | 94.8  | 98.43           | 96.53 | 98.83           | 97.11 | 98.83         | 95.95 |
|                              | MF589131.1            | CN/Jiangxi-G1/2016    | 2016            | 99.22                                | 97.11 | 99.22             | 97.11 | 99.02             | 96.53 | 99.02             | 96.53 | 98.43           | 95.95 | 98.83           | 96.53 | 98.43         | 95.38 |
|                              | MF589134.1            | CN/Jiangxi-XY/2017    | 2017            | 99.02                                | 97.11 | 99.02             | 97.11 | 98.83             | 96.53 | 98.83             | 96.53 | 98.24           | 95.95 | 98.63           | 96.53 | 98.24         | 95.38 |
|                              | MF589122.1            | CN/Guangxi-NK/2015    | 2015            | 99.02                                | 96.53 | 99.02             | 96.53 | 98.83             | 95.95 | 98.83             | 95.95 | 98.24           | 95.38 | 98.63           | 95.95 | 98.24         | 94.8  |
| 3c                           | MF589115.1            | CN/Guangdong-JM1/2016 | 2016            | 99.02                                | 96.53 | 99.02             | 96.53 | 98.83             | 95.95 | 98.83             | 95.95 | 98.24           | 95.38 | 98.63           | 95.95 | 98.24         | 94.8  |
|                              | MF589118.1            | CN/Guangdong-X1/2016  | 2016            | 99.02                                | 97.11 | 99.02             | 97.11 | 98.83             | 96.53 | 98.83             | 96.53 | 98.24           | 95.95 | 98.63           | 96.53 | 98.24         | 95.38 |
|                              | MF589111.1            | CN/Fujian-KP1/2016    | 2016            | 99.22                                | 97.11 | 99.22             | 97.11 | 99.02             | 96.53 | 99.02             | 96.53 | 98.43           | 95.95 | 98.83           | 96.53 | 98.43         | 95.38 |
|                              | MF589109.1            | CN/Fujian/HWK1/2016   | 2016            | 98.83                                | 96.53 | 98.83             | 96.53 | 98.63             | 95.95 | 98.63             | 95.95 | 98.04           | 95.38 | 98.43           | 95.95 | 98.04         | 94.8  |
|                              | MN788132.1            | CN/HLJ/HLJ22/2019     | 2019            | 99.02                                | 97.11 | 99.02             | 97.11 | 98.83             | 96.53 | 98.83             | 96.53 | 98.24           | 95.95 | 98.63           | 96.53 | 98.24         | 95.38 |
|                              | MW167067.1            | 35                    | 2020            | 99.22                                | 97.11 | 99.22             | 97.11 | 99.02             | 96.53 | 99.02             | 96.53 | 98.43           | 95.95 | 98.83           | 96.53 | 98.43         | 95.38 |
|                              | MK580466.1            | CN/Taizhou/2018       | 2018            | 99.02                                | 96.53 | 99.02             | 96.53 | 98.83             | 95.95 | 98.83             | 95.95 | 98.24           | 95.38 | 98.63           | 95.95 | 98.24         | 94.8  |
|                              | KY075990.1            | Chongqing-147/2016    | 2016            | 99.02                                | 96.53 | 99.02             | 96.53 | 99.22             | 97.11 | 98.83             | 95.95 | 98.63           | 96.53 | 99.02           | 97.11 | 98.63         | 95.95 |
|                              | MF139083.1            | CN/Hebei-388/2015     | 2015            | 98.83                                | 95.95 | 98.83             | 95.95 | 99.02             | 96.53 | 98.63             | 95.38 | 98.43           | 95.95 | 98.83           | 96.53 | 98.43         | 95.38 |
